# Supplementary material for: Two Novel Betarhabdovirids Infecting Ornamental Plants and the Peculiar Intracellular Behavior of the Cytorhabdovirus in the Liana <em>Aristolochia gibertii</em>
Source: Preprints.org preprint supplement (doi:10.20944/preprints202401.1679.v1), 2024-01-23
Supplement: Supplementary file 1 [file supplementary]

| **Primer** | **Sequence 5’-3’** | **Target position of the specific primers in the virus antigenomic strand** | **Reference** |
| --- | --- | --- | --- |
| **Degenerate primers for the detection of plant rhabdoviruses** | | |  |
| RhabF | GGATMTGGGGBCATCC |  | [14] |
| RhabR | GTCCABCCYTTTTGYC |  |
| **Specific primers for the detection of AaCV** | | |  |
| AaCV 1F | TTGGAGCACATTATACATTAATC | 67-89 | [This study] |
| AaCV 1Fa | AAGAGAGTGCAAGGATTTG | 170-188 |
| AaCV 1R | TCTTTCAGTGCAGCATTATG | 1040-1059 |
| AaCV 1Ra | TTCCTAGTCTTTCTGGTACTC | 420-440 |
| AaCV 2F | CAATTTGGTTGCTCAATAGTC | 1005-1025 |
| AaCV 2R | CAGACCTTCCTCTCTTGAG | 1882-1900 |
| AaCV 3F | GCTGGAAAGAAAGGAGAAG | 1812-1830 |
| AaCV 3R | TGCCTTATCTTGCTGTTTTG | 2608-2027 |
| AaCV 4F | GGACCCAGAGGTGATAAAAG | 2528-2547 |
| AaCV 4R | GACTGATCCTACGTCGTTC | 3316-3334 |
| AaCV 5F | CGATTAAATTTCAGGAGATACAG | 3246-3268 |
| AaCV 5R | CTTTCTCATCATGTTTGAACAG | 4093-4114 |
| AaCV 6F | ATCATGTTACGCCATTGAC | 4040-4056 |
| AaCV 6R | AAACCTTCCAAAGAGCAAG | 4970-4988 |
| AaCV 7F | GATTTGCGACTCGAAGATAG | 4914-4933 |
| AaCV 7R | GCTTTACCAACTTACAGTGATG | 5857-5878 |
| AaCV 8F | ATGATTGCTGCAAAAGGAG | 5812-5830 |
| AaCV 8R | AAGATGGAAGTCCCCTATG | 6803-6821 |
| AaCV 9F | TCTTTCTGATCTTGATTTCGAG | 6755-6776 |
| AaCV 9R | TCCTCGACATCAGAAACTG | 7684-7702 |
| AaCV 10F | AATCTGAAAGTGTCTGGATTTG | 7632-7653 |
| AaCV 10R | TTAAAAAGGTGAAAGGTAGTCTC | 8589-8611 |
| AaCV 11F | CTGCATAAATATGGATTTCGAAAAG | 8543-8567 |
| AaCV 11R | TATCTTGGCACAGTATTGAATAG | 9603-9625 |
| AaCV 12F | AAGGGTTTAGAGAAGAAAGGA | 9538-9558 |
| AaCV 12R | TTATACTTTTGTTCTGCATTGC | 10453-10474 |
| AaCV 13F | CAACAATCTAGCGTCCATTAC | 10385-10405 |
| AaCV 13R | GCAAAACCATCTCTGATCTC | 11212-11231 |
| AaCV 14F | TTAAAGGGATGTTGAGTATGTTC | 11161-11183 |
| AaCV 14R | CATTGGATAAATTCAGTATGTTTTC | 12054-12078 |
| AaCV 15F | AGCATACCCAACACTGAAC | 12000-12018 |
| AaCV 15Fa | CAACTCTCTCTGCGATTATTAG | 12747-12768 |
| AaCV 15R | ATAAATGTATGATGACATAGTTTTACTG | 13073-13100 |
| AaCV RACE-5’ | GGGTGGTTCTATGAAAGCGGGATAACACAATGG | 12600-12632 |
| AaCV RACE-3’ | TCTCCAAACGGATTTGCTGGAGCCTTCG | 552-579 |
| **Specific primers for the detection of** FaJV | | |  |
| FaJV_N_F | GAGCGGTTGTGAGTTAGCAG | 1039-1058 | [This study] |
| FaJV_N_R | TCGGTGTGTATCTTGCCTGT | 1409-1428 |

Table supplementary S1. List of primers used in the study of the betarhabdoviruses AaCV and FaJV.
